# Supplementary material
Source: Springer Nature journal article supplement (https://www.springermedizin.de/resource/supplementary/12865_2009_265_MOESM8_ESM.pdf/9427632)

# ME Mucosal Thickness

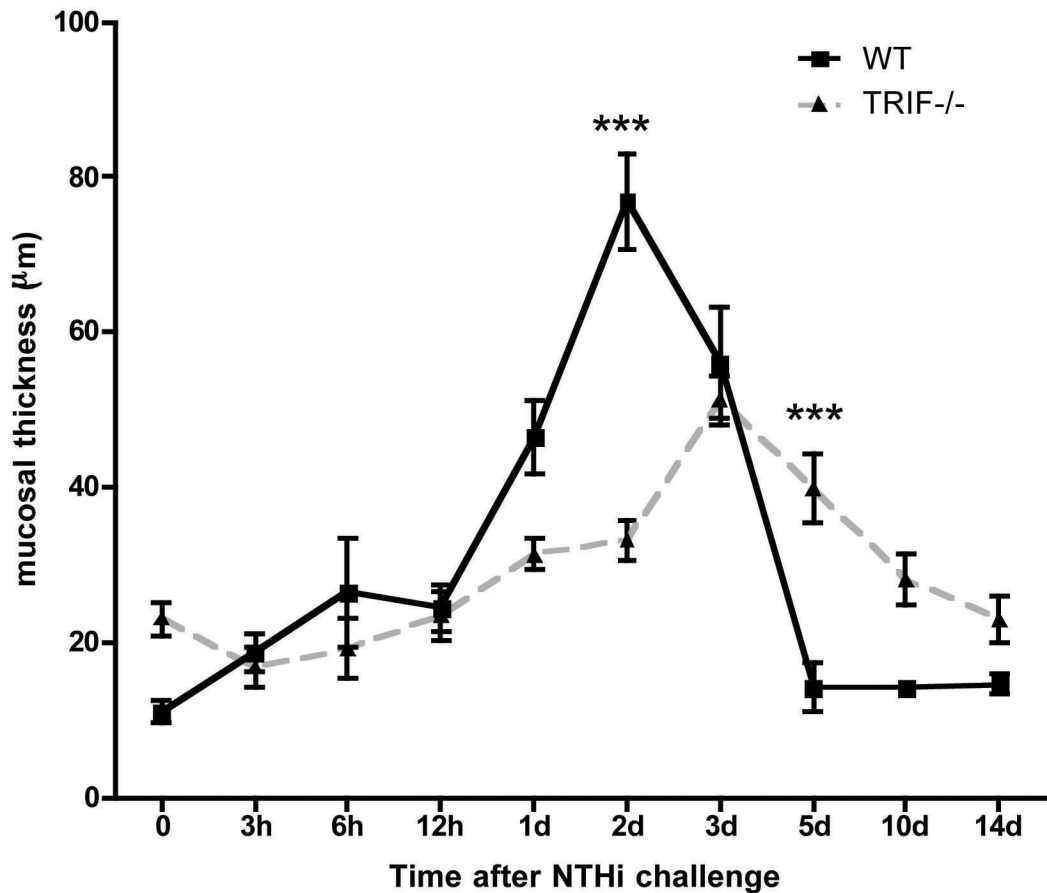

Supplement: MOESM8 [file 9427632]
